# Supplementary material for: Learning from a large-scale calibration effort of multiple lake models
Source: Copernicus journal article supplement (doi:10.5194/egusphere-2024-2447), 2024-08-08
Supplement: Supplementary file 1 [file egusphere-2024-2447-supplement.pdf]

# S1 Additional material

## S1.1 Additional Plots

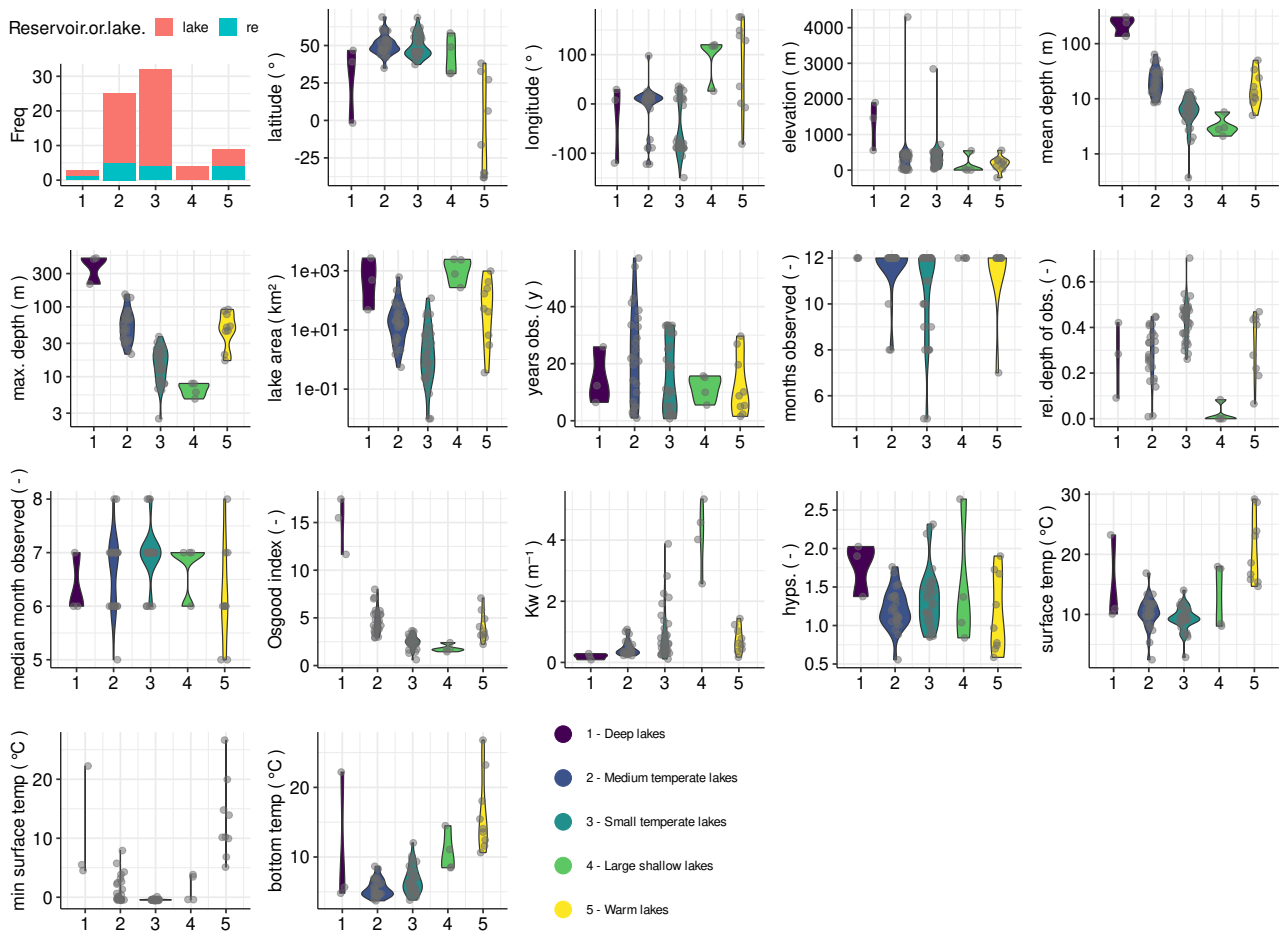

Figure S1: Distribution of lake characteristics for the cluster derived by K-means clustering. The grey points indicate values for individual lakes.

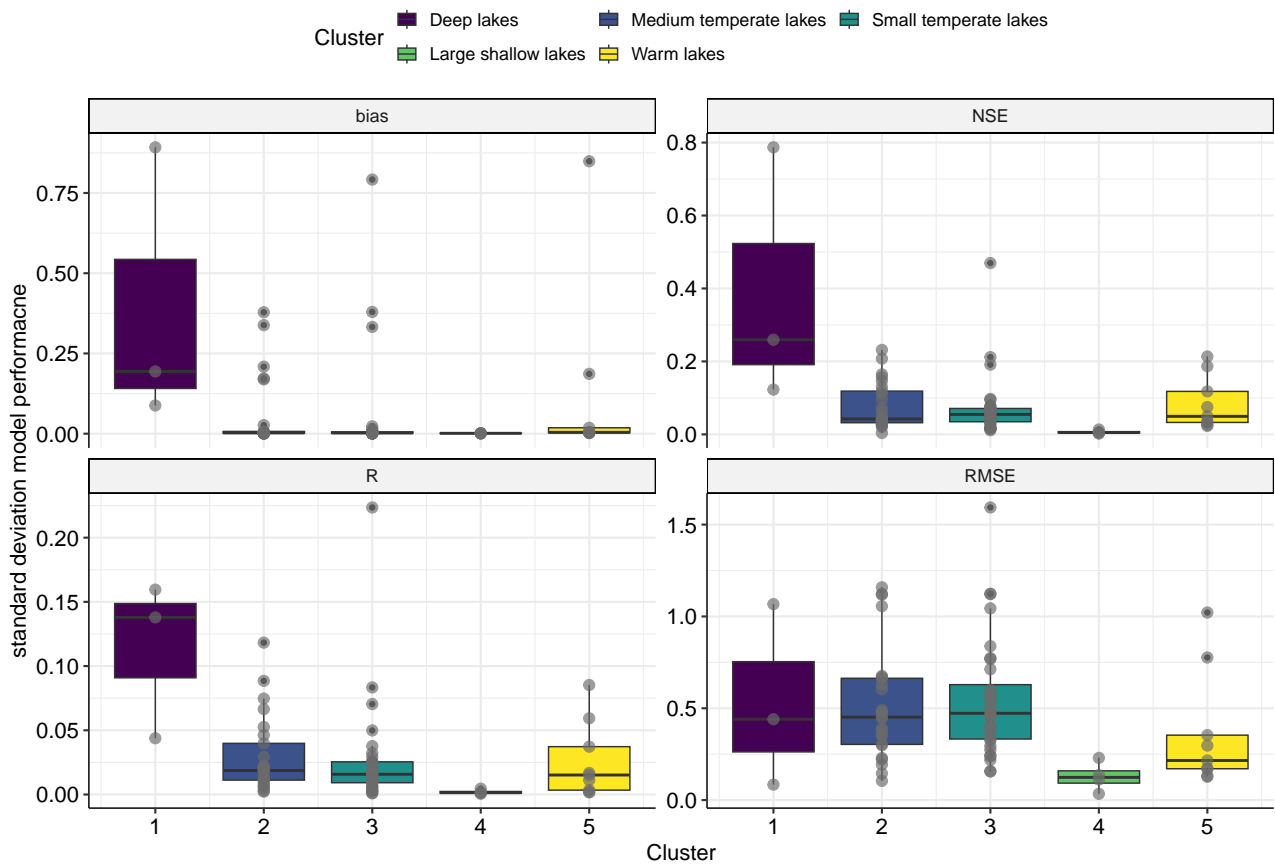

Figure S2: Boxplots of absolute difference between best and worst performing model per lake for the different metrics and lake cluster. The grey points indicate values for individual lakes.

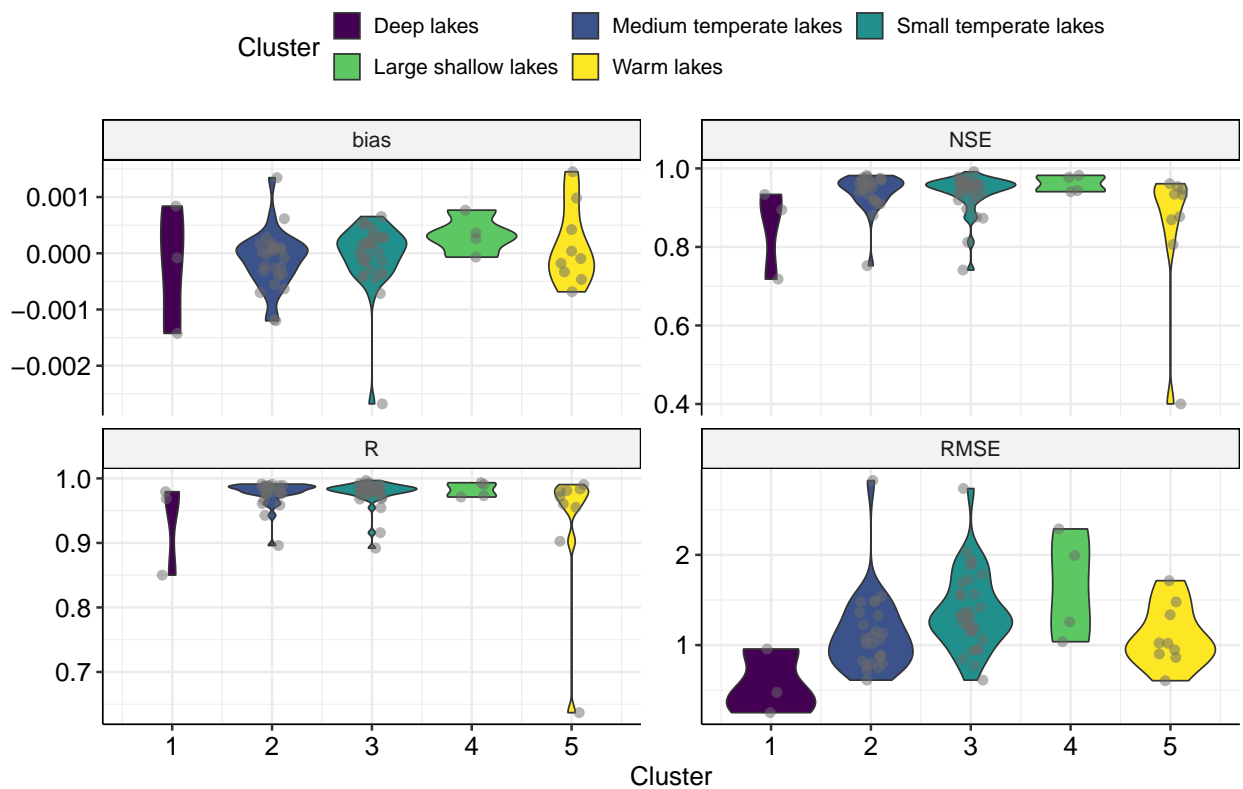

Figure S3: Violin plots of model performance of the best-performing model in each lake, split by lake cluster and performance metric. The grey points indicate values for individual lakes.

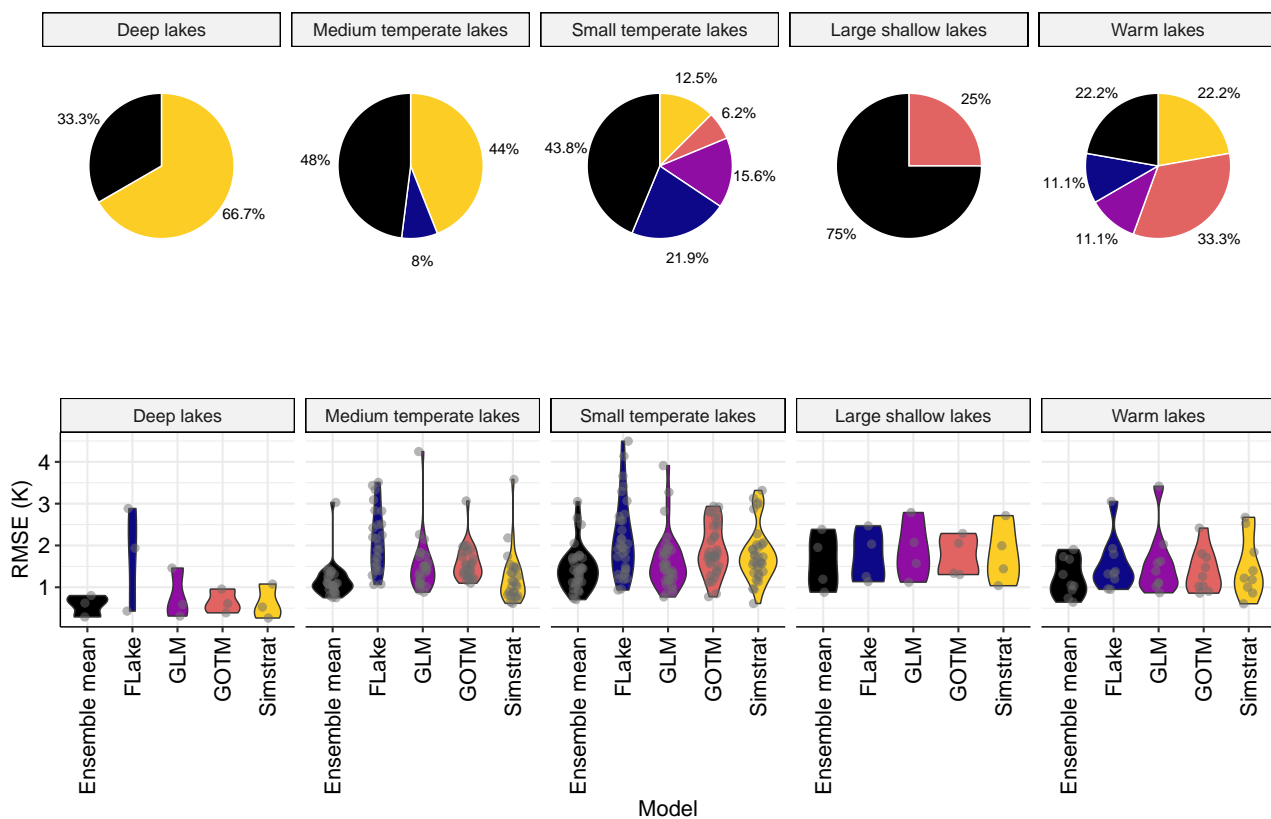

Figure S4: Percentage of lakes where each model performs best in terms of root mean squared error (RMSE), split to the archetype and including the ensemble mean as its own predictor (top, color refers to model or ensemble mean). Distribution of best performing parameter set (RMSE) per archetype (below).

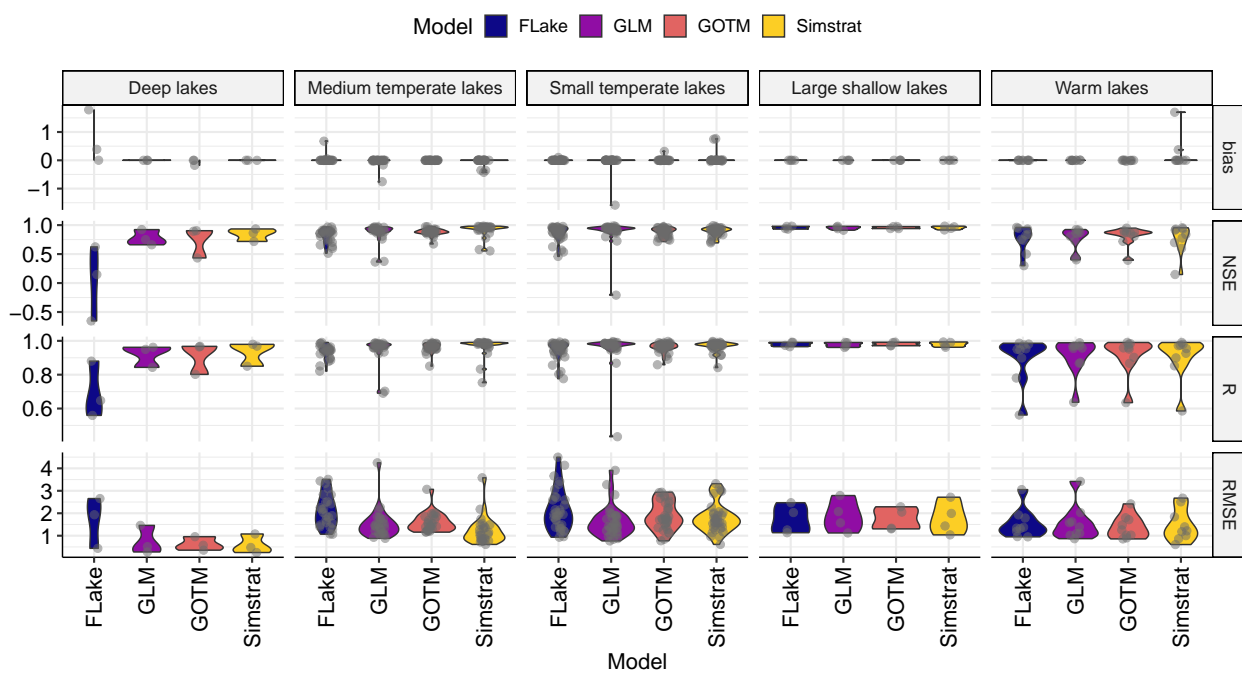

Figure S5: Violin plots of the performance metrics for best performing parameter sets per lake for each model, lake cluster, and performance metric.

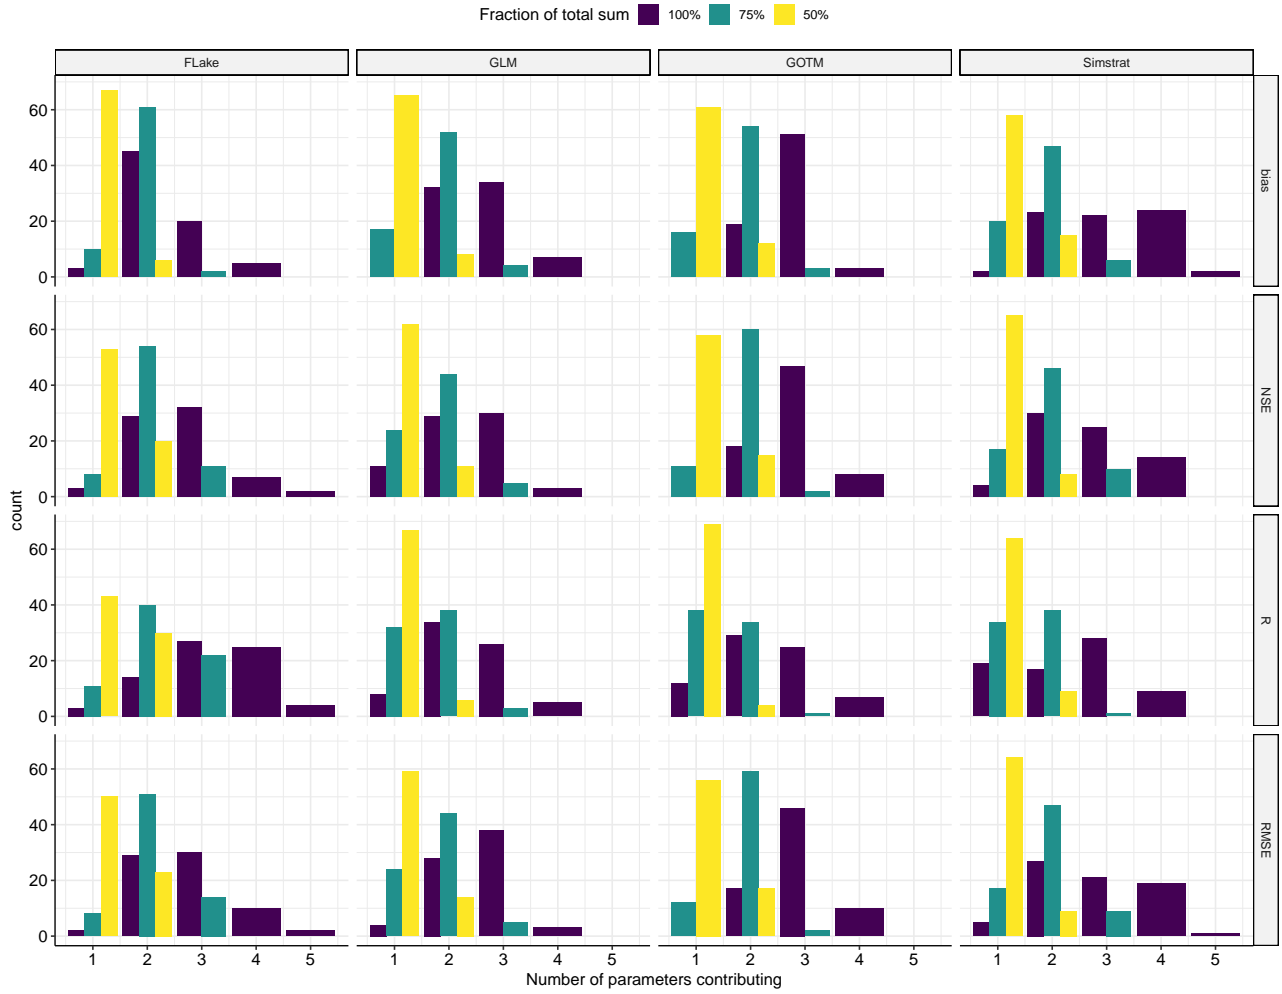

Figure S6: Distribution of the number of parameters that contribute to different fractions of the total sum of sensitivity measure value for each model and performance metric. For example, one contributing parameter for a fraction of 50% means that only one parameter contributes with at least 50% to the sum of all estimated sensitivity measures.

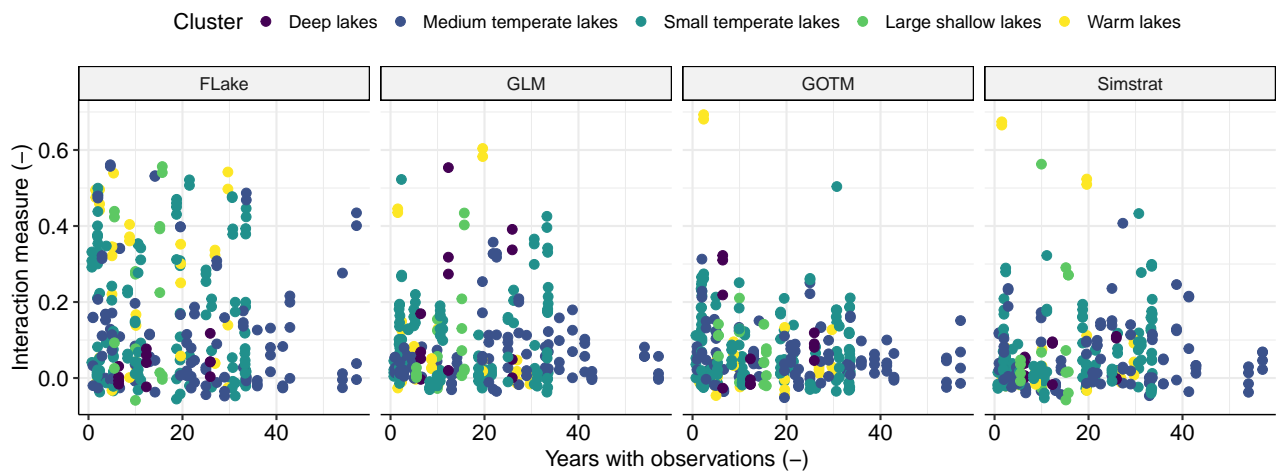

Figure S7: Interaction measure plotted against number of years with observed water temperature for the four models and lake cluster.

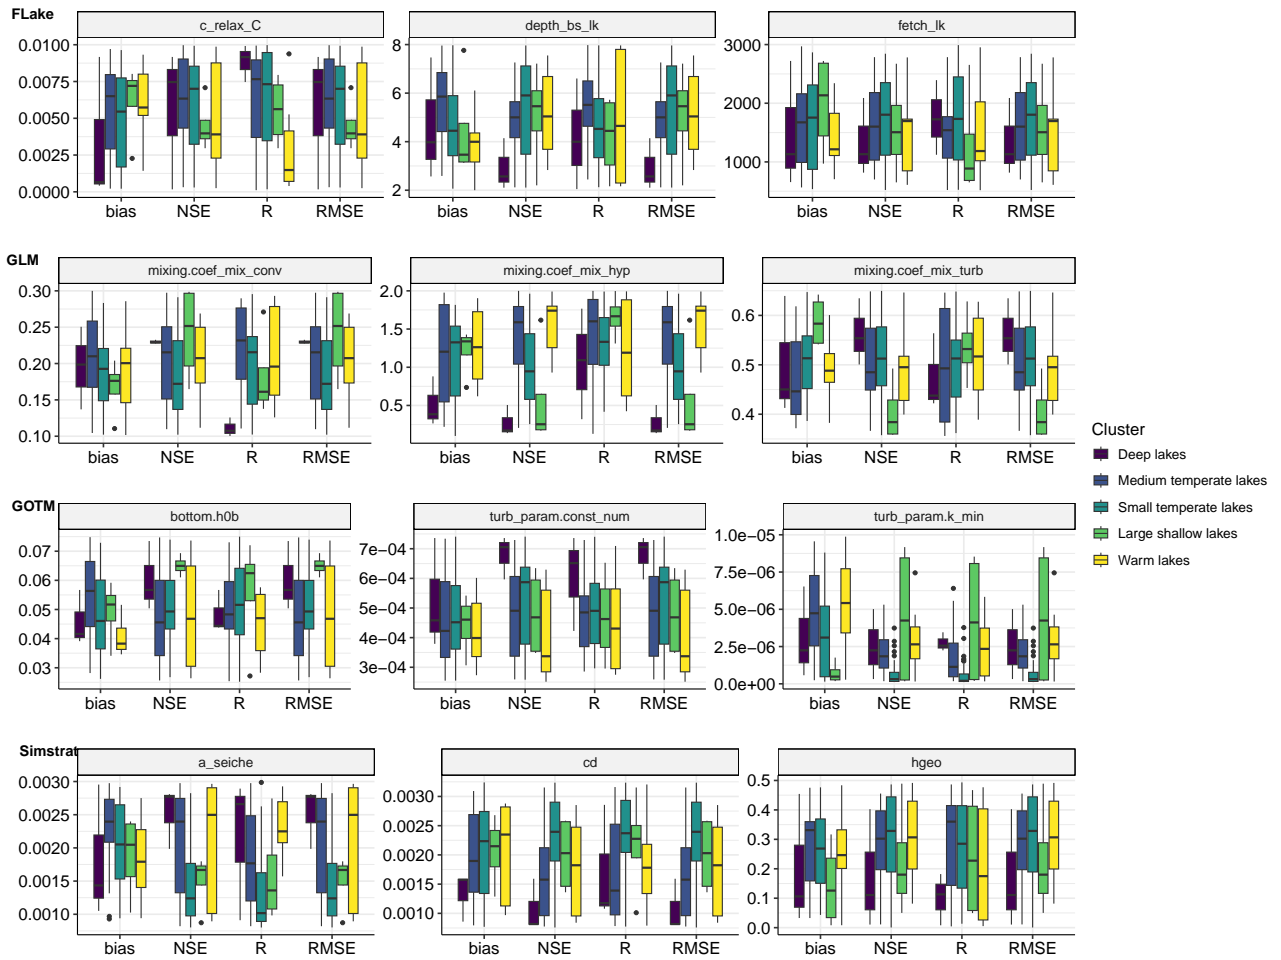

Figure S8: Boxplot of model specific parameters of the best performing parameter set for the different performance measures and lake cluster.

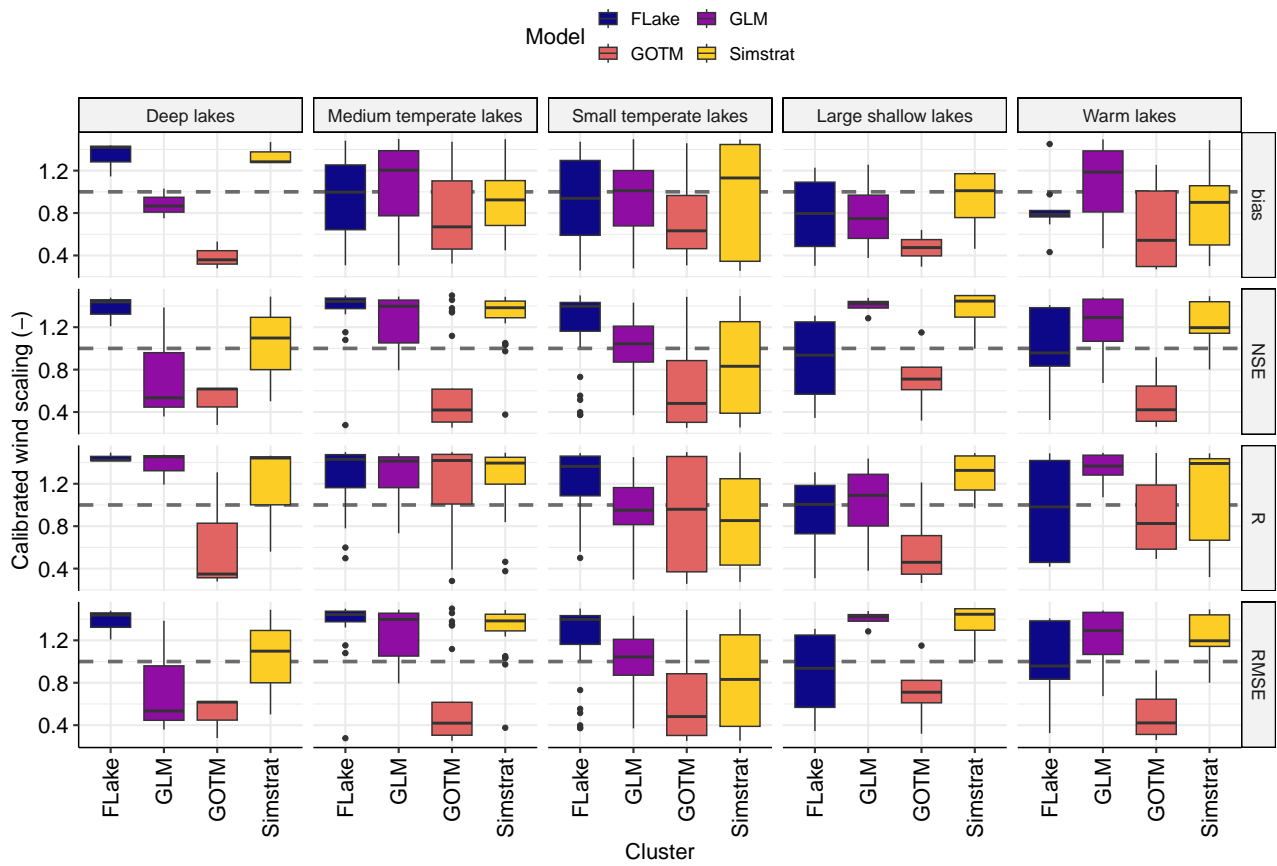

Figure S9: Boxplot of the wind speed scaling factors for the different models, cluster and based on which performance metric was chosen to optimize.

## S1.2 Additional Tables

**Table S1.** Overview of the simulated lakes and their characteristics.

| Lake Name               | Country         | Latitude (°) | Longitude (°) | Elevation (m) | Mean depth (m) | Max depth (m) | Lake area (km <sup>2</sup> ) | Secchi disk depth (m) | Light extinction (m <sup>-1</sup> ) | Lake cluster     |
|-------------------------|-----------------|--------------|---------------|---------------|----------------|---------------|------------------------------|-----------------------|-------------------------------------|------------------|
| Allequash Lake          | USA             | 46.04        | -89.62        | 494           | 2.9            | 8             | 1.64                         | 3.2                   |                                     | Small temperate  |
| Alqueva Reservoir       | Portugal        | 38.2         | -7.49         | 152           | 16.6           | 92            | 250                          | 3.15                  | 0.69                                | Warm             |
| Lake Annie              | USA             | 27.21        | -81.35        | 33.7          | 8.57           | 20.7          | 0.36                         |                       |                                     | Warm             |
| Lake Arendsee           | Germany         | 52.89        | 11.47         | 23            | 28.8           | 49            | 5.11                         | 2.89                  |                                     | Medium temperate |
| Lake Argyle             | Australia       | -16.31       | 128.68        | 100           | 10.1           | 51            | 980                          |                       | 0.89                                | Warm             |
| Lake Biel               | Switzerland     | 47.08        | 7.16          | 429           | 30             | 74            | 39.3                         |                       | 0.51                                | Medium temperate |
| Big Muskellunge Lake    | USA             | 46.02        | -89.61        | 500           | 7.5            | 21.3          | 3.63                         | 6.6                   |                                     | Small temperate  |
| Black Oak Lake          | USA             | 46.16        | -89.32        | 521.51        | 10.36          | 25.91         | 2.28                         | 3.2                   |                                     | Small temperate  |
| Lake Bosumtwi           | Ghana           | 6.3          | 1.25          | 210           | 34             | 78            | 52                           | 1.2                   |                                     | Warm             |
| Lake Bryrup             | Denmark         | 56.02        | 9.52          | 66            | 4.6            | 9             | 0.37                         | 2.1                   |                                     | Small temperate  |
| Lake Burley Griffin     | Australia       | -35.3        | 149.07        | 556           | 5              | 17            | 6.64                         | 1.4                   |                                     | Warm             |
| Lake Chao               | China           | 31.53        | 117.53        | 4.5           | 3              | 7.98          | 780                          | 0.38                  |                                     | Large shallow    |
| Crystal Lake            | USA             | 46           | -89.61        | 501           | 10.4           | 20.4          | 0.38                         | 7.5                   |                                     | Small temperate  |
| Crystal Bog             | USA             | 46.01        | -89.61        | 501.5         | 1.7            | 2.5           | 0.01                         | 1.5                   |                                     | Small temperate  |
| Delavan Lake            | USA             | 42.61        | -88.6         | 282.55        | 7.61           | 16.46         | 6.96                         | 3.53                  |                                     | Small temperate  |
| Dickie Lake             | Canada          | 45.15        | -79.09        | 341           | 5              | 12            | 0.94                         | 3.08                  |                                     | Small temperate  |
| Eagle Lake              | Canada          | 44.68        | -76.7         | 190           | 10.1           | 31.1          | 6.65                         | 4.62                  |                                     | Small temperate  |
| Ekoln basin of Malaren  | Sweden          | 59.75        | 17.62         | 0.7           | 11.5           | 50            | 20.18                        |                       | 1.09                                | Medium temperate |
| Lake Erken              | Sweden          | 59.84        | 18.63         | 10            | 9              | 21            | 24                           | 3.83                  |                                     | Medium temperate |
| Esthwaite Water         | United Kingdom  | 54.37        | -2.99         | 65            | 6.9            | 16            | 0.96                         |                       | 0.82                                | Small temperate  |
| Falling Creek Reservoir | USA             | 37.31        | -79.84        | 507           | 4              | 9.3           | 119                          |                       | 0.87                                | Small temperate  |
| Lake Feeagh             | Ireland         | 53.9         | -9.5          | 15            | 14.5           | 44            | 3.9                          | 1.74                  | 0.98                                | Medium temperate |
| Fish Lake               | USA             | 43.29        | -89.65        | 265           | 6.6            | 18.9          | 0.8                          | 2.4                   |                                     | Small temperate  |
| Great Pond              | USA             | 44.53        | -69.89        | 81            | 6.3            | 21            | 33.83                        | 6.7                   |                                     | Small temperate  |
| Green Lake              | USA             | 43.81        | -89           | 243           | 33.55          | 72            | 29.48                        | 4.8                   |                                     | Medium temperate |
| Harp Lake               | Canada          | 45.38        | -79.13        | 327           | 13.32          | 37.5          | 0.71                         | 4.08                  |                                     | Small temperate  |
| Hassel Predam           | Germany         | 51.71        | 10.83         | 504           | 5              | 14            | 0.26                         | 2.15                  |                                     | Small temperate  |
| Lake Hulun              | China           | 49           | 117.39        | 545.6         | 5.75           | 8             | 2339                         | 0.35                  |                                     | Large shallow    |
| Kilpisjarvi             | Finland         | 69.03        | 20.77         | 473           | 20             | 57            | 37.3                         |                       | 0.3                                 | Medium temperate |
| Lake Kinneret           | Israel          | 32.82        | 35.58         | -210          | 24             | 45            | 168                          | 2.95                  | 0.51                                | Warm             |
| Lake Kivu               | Rwanda/DR Congo | -1.73        | 29.24         | 1463          | 240            | 485           | 2700                         | 5.21                  | 0.27                                | Deep             |
| Klicava Reservoir       | Czechia         | 50.07        | 13.93         | 294.6         | 13.1           | 35            | 0.55                         | 5.5                   |                                     | Medium temperate |
| Lake Kuivajarvi         | Finland         | 60.47        | 23.51         | 130           | 6.3            | 13.2          | 0.62                         |                       | 0.6                                 | Small temperate  |
| Lake Langtjern          | Norway          | 60.37        | 9.73          | 510           | 2              | 12            | 0.23                         | 1.4                   | 2.25                                | Small temperate  |
| Laramie Lake            | USA             | 40.62        | -105.84       | 2843.8        | 0.37           | 6.4           | 0.14                         | 0.6                   |                                     | Small temperate  |
| Lower Lake Zurich       | Switzerland     | 47.28        | 8.58          | 406           | 49             | 136           | 67                           |                       | 0.39                                | Medium temperate |
| Lake Mendota            | USA             | 43.1         | -89.41        | 258.5         | 12.8           | 25.3          | 39.61                        | 3                     |                                     | Small temperate  |
| Lake Monona             | USA             | 43.06        | -89.36        | 257           | 8.2            | 22.5          | 13.6                         | 2.4                   |                                     | Small temperate  |
| Mozhaysk reservoir      | Russia          | 55.59        | 35.82         | 183           | 7              | 23            | 30.7                         | 1                     |                                     | Small temperate  |
| Mt Bold                 | Australia       | -35.12       | 138.71        | 242.9         | 13             | 45.4          | 3.08                         | 1.24                  | 1.16                                | Warm             |
| Lake Muggelsee          | Germany         | 52.43        | 13.65         | 32.3          | 4.9            | 7.7           | 7.4                          | 2                     | 1.48                                | Small temperate  |
| Lake Murten             | Switzerland     | 46.93        | 7.08          | 429           | 22             | 45            | 22.8                         | 3.49                  |                                     | Medium temperate |
| Lake Neuchatel          | Switzerland     | 46.54        | 6.52          | 429           | 64             | 152           | 217                          |                       | 0.25                                | Medium temperate |
| Ngoring                 | China           | 34.9         | 97.7          | 4300          | 17.6           | 30.7          | 611                          |                       | 0.3                                 | Medium temperate |
| Lake Nohipalo Mustjaerv | Estonia         | 57.93        | 27.34         | 61            | 3.9            | 8.9           | 0.22                         | 0.46                  |                                     | Small temperate  |

|                     |                |        |         |        |       |       |       |       |      |                  |
|---------------------|----------------|--------|---------|--------|-------|-------|-------|-------|------|------------------|
| Lake Nohipalo       | Estonia        | 57.94  | 27.35   | 62     | 6.2   | 12.5  | 0.07  | 4.52  |      | Small temperate  |
| Valgejaerv          |                |        |         |        |       |       |       |       |      |                  |
| Okauchee Lake       | USA            | 43.13  | -88.43  | 269    | 7.62  | 28.65 | 4.9   | 6.94  |      | Small temperate  |
| Lake Paaijarvi      | Finland        | 61.07  | 25.13   | 102    | 15    | 85    | 13.44 | 2.2   | 1.15 | Medium temperate |
| Rappbode Reservoir  | Germany        | 51.74  | 10.89   | 415    | 28.6  | 89    | 3.95  | 4.8   | 0.25 | Medium temperate |
| Rappbode Predam     | Germany        | 51.71  | 10.8    | 533    | 5.3   | 16    | 0.24  | 2.26  |      | Small temperate  |
| Rimov Reservoir     | Czechia        | 48.85  | 14.49   | 471.48 | 16    | 44    | 2.11  | 2.9   |      | Medium temperate |
| Lake Rotorua        | New Zealand    | -38.08 | 176.28  | 280    | 10.8  | 52.9  | 425   | 2.63  | 0.61 | Warm             |
| Lake Sammamish      | USA            | 47.59  | -122.1  | 9      | 17.7  | 32    | 19.8  | 5     |      | Medium temperate |
| Sau Reservoir       | Spain          | 41.97  | 2.4     | 425    | 29    | 65    | 5.8   | 2.57  | 0.84 | Medium temperate |
| Lake Scharmutzelsee | Germany        | 52.25  | 14.05   | 38.3   | 8.8   | 29    | 12.1  | 2     |      | Medium temperate |
| Sparkling Lake      | USA            | 46.01  | -89.7   | 495    | 10.9  | 20    | 0.64  | 6.2   |      | Small temperate  |
| Lake Stechlin       | Germany        | 53.17  | 13.03   | 59.8   | 23.2  | 69.5  | 2.23  | 8.6   | 0.29 | Medium temperate |
| Lake Sunapee        | USA            | 43.23  | -72.5   | 333    | 11.4  | 34    | 16.55 | 8.5   |      | Medium temperate |
| Lake Tahoe          | USA            | 39.09  | -120.03 | 1897   | 304.8 | 501   | 490   | 19.9  |      | Deep             |
| Lake Taihu          | China          | 31.24  | 120.17  | 3.3    | 2.1   | 4.8   | 2445  | 0.3   |      | Large shallow    |
| Lake Tarawera       | New Zealand    | -38.21 | 176.43  | 300    | 50    | 87.5  | 41.3  | 8.34  | 0.18 | Warm             |
| Lake Thun           | Switzerland    | 46.7   | 7.7     | 558    | 136   | 212   | 48.3  | 8.05  |      | Deep             |
| Toolik Lake         | USA            | 68.63  | -149.6  | 720    | 7     | 25    | 1.49  | 4.6   |      | Small temperate  |
| Trout Lake          | USA            | 46.03  | -89.67  | 491.8  | 14.6  | 35.7  | 15.65 | 4.7   |      | Medium temperate |
| Trout Bog           | USA            | 46.04  | -89.69  | 495    | 5.6   | 7.9   | 0.01  | 1.1   |      | Small temperate  |
| Two Sisters Lake    | USA            | 45.77  | -89.53  | 481    | 9.14  | 19.2  | 2.91  | 17.75 |      | Small temperate  |
| Lake Vendyurskoe    | Russia         | 62.1   | 33.1    | 131    | 5.3   | 13.4  | 10.4  | 3.5   | 1.5  | Small temperate  |
| Lake Vortsjarv      | Estonia        | 58.31  | 26.01   | 33     | 2.8   | 6     | 270   | 0.86  | 2.76 | Large shallow    |
| Lake Washington     | USA            | 47.64  | -122.27 | 5      | 33    | 65.2  | 87.6  | 5.3   |      | Medium temperate |
| Windermere          | United Kingdom | 54.31  | -2.95   | 39     | 21.3  | 64    | 14.76 |       | 0.46 | Medium temperate |
| Lake Wingra         | USA            | 43.05  | -89.43  | 254    | 2.7   | 6.7   | 1.36  | 0.7   |      | Small temperate  |
| Zlutice Reservoir   | Czechia        | 50.09  | 13.11   | 507.95 | 8.5   | 24    | 1.5   | 2.8   |      | Medium temperate |
| Lake Zurich         | Switzerland    | 47.28  | 8.6     | 406    | 51    | 136   | 68.2  | 5.04  |      | Medium temperate |



Table S2: Characteristics of the lakes used for cluster analysis.

|                    |                                                                                       |                 |
|--------------------|---------------------------------------------------------------------------------------|-----------------|
| Reservoir.or.lake. | either lake or reservoir                                                              | -               |
| latitude.dec.deg   | coordinates of the lake latitude                                                      | °C              |
| longitude.dec.deg  | coordinates of the lake longitude                                                     | °C              |
| elevation.m        | elevation of the lake                                                                 | m               |
| mean.depth.m       | mean depth of the lake                                                                | m               |
| max.depth.m        | maximum depth of the lake                                                             | m               |
| lake.area.sqkm     | lake surface area                                                                     | km <sup>2</sup> |
| Duration           | number of years with observations                                                     | y               |
| months_meas        | number of unique months in which observations were available                          | -               |
| reldepth_median    | median relative depth of the observations (0 means surface, 1 means bottom)           | -               |
| months_median      | median month of the observations                                                      | -               |
| kw                 | Average calibrated light extinction factor                                            | m <sup>-1</sup> |
| vd                 | Volume development (Håkanson, 1981)                                                   | -               |
| osgood             | Osgood index (Osgood, 1988)                                                           | -               |
| tsurf              | average annual surface temperature for the period 1980 – 2000 from simulation         | °C              |
| min_tsurf          | average annual minimum surface temperature for the period 1980 – 2000 from simulation | °C              |
| tbot               | average annual surface bottom for the period 1980 – 2000 from simulation              | °C              |

Table S3: Median RMSE of the calibrated models and the percentage of calibrated fits lower than 2 K

| model    | Median RMSE (K) | Percentage under 2 K |
|----------|-----------------|----------------------|
| FLake    | 1.91            | 56.2                 |
| GLM      | 1.42            | 83.6                 |
| GOTM     | 1.58            | 76.7                 |
| Simstrat | 1.40            | 80.8                 |

## References

- Håkanson, L.: A Manual of Lake Morphometry, Springer Berlin Heidelberg, Berlin, Heidelberg, <https://doi.org/10.1007/978-3-642-81563-8>, 1981.
- Osgood, R. A.: Lake mixis and internal phosphorus dynamics, *Archiv für Hydrobiologie*, pp. 629–638, <https://doi.org/10.1127/archiv-hydrobiol/113/1988/629>, publisher: Schweizerbart'sche Verlagsbuchhandlung, 1988.
